# Supplementary material
Source: PubMed Central journal article supplement (PMC7316186)
Supplement: NIHMS1588848-supplement-Supplementary_Information.pdf [file NIHMS1588848-supplement-Supplementary_Information.pdf]

1           Supplementary information for:  
2           Temperature dependence of parasitic  
3           infection and gut bacterial communities  
4           in bumble bees

5

6           Running title: Temperature affects bee infection and microbiota

7

8           Evan C Palmer-Young <sup>1\*</sup>, Lyna Ngor <sup>1</sup>, Rodrigo Burciaga Nevarez <sup>1</sup>, Jason A. Rothman <sup>1</sup>, Thomas R  
9           Raffel <sup>2</sup>, Quinn S McFrederick <sup>1</sup>

10

11           <sup>1</sup> Department of Entomology, University of California Riverside, Riverside, CA, USA

12           <sup>2</sup> Department of Biology, Oakland University, Rochester, MI, USA

13           \*Corresponding author: [ecp52@cornell.edu](mailto:ecp52@cornell.edu)

14

15

16 **CONTENTS**

17       Supplementary figures..... 3

18       Supplementary tables ..... 4

19

20

21 **SUPPLEMENTARY FIGURES**

22

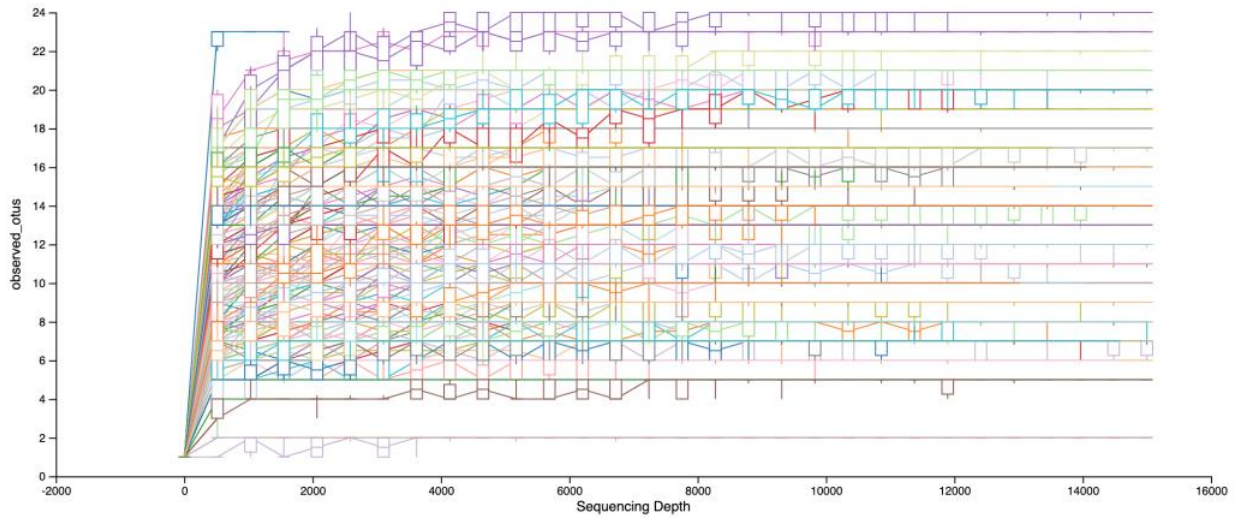

23

24 **Supplementary Figure 1. Rarefaction plot** of sequencing data. Lines show cumulative number of Exact  
25 Sequence Variants (y-axis) as a function of read depth (x-axis). Each line represents one sample.

26 **SUPPLEMENTARY TABLES**27 **Supplementary Table 1. Sample sizes** by infection treatment, temperature, and colony.

28 A. Infection treatment and temperature

| Infection | Temperature | N  |
|-----------|-------------|----|
| Parasite  | 21          | 67 |
| Parasite  | 25          | 64 |
| Parasite  | 29          | 64 |
| Parasite  | 33          | 64 |
| Parasite  | 37          | 63 |
| Sham      | 21          | 43 |
| Sham      | 25          | 42 |
| Sham      | 29          | 40 |
| Sham      | 33          | 39 |
| Sham      | 37          | 39 |

29

30 B. Colony

| Colony | N   |
|--------|-----|
| E08    | 90  |
| E09    | 106 |
| E10    | 129 |
| E11    | 110 |
| E12    | 90  |

31

32

33 **Supplementary Table 2. Significance of terms in models of bacterial abundance by temperature.** A  
 34 separate model was fit for abundance of total bacteria and of each family (column “Family”). “Infection”  
 35 refers to infection treatment (parasite-inoculated or sham control). “Marginal.cell” refers to length of  
 36 the forewing marginal cell, an index of bee body size. “Significance” column indicates predictors with  $P <$   
 37  $0.05$  (\*),  $P < 0.01$  (\*\*), and  $P < 0.001$  (\*\*\*)).

| Family             | Predictor                | $\chi^2$ | df | P       | Significance |
|--------------------|--------------------------|----------|----|---------|--------------|
| Total              | Temperature              | 0.004    | 1  | 0.95    |              |
| Total              | Temperature <sup>2</sup> | 20.486   | 1  | < 0.001 | ***          |
| Total              | Infection                | 1.689    | 1  | 0.19    |              |
| Total              | Colony                   | 15.372   | 4  | 0.004   | **           |
| Total              | Marginal.cell            | 28.749   | 1  | < 0.001 | ***          |
| Orbaceae           | Temperature              | 3.425    | 1  | 0.064   | .            |
| Orbaceae           | Infection                | 0.134    | 1  | 0.71    |              |
| Orbaceae           | Colony                   | 10.769   | 4  | 0.029   | *            |
| Orbaceae           | Marginal.cell            | 14.151   | 1  | < 0.001 | ***          |
| Neisseriaceae      | Temperature              | 5.405    | 1  | 0.02    | *            |
| Neisseriaceae      | Infection                | 0.192    | 1  | 0.66    |              |
| Neisseriaceae      | Colony                   | 3.037    | 4  | 0.55    |              |
| Neisseriaceae      | Marginal.cell            | 4.11     | 1  | 0.043   | *            |
| Lactobacillaceae   | Temperature              | 25.15    | 1  | < 0.001 | ***          |
| Lactobacillaceae   | Infection                | 0.049    | 1  | 0.82    |              |
| Lactobacillaceae   | Temperature <sup>2</sup> | 4.842    | 1  | 0.028   | *            |
| Lactobacillaceae   | Colony                   | 16.252   | 4  | 0.0027  | **           |
| Lactobacillaceae   | Marginal.cell            | 10.469   | 1  | 0.0012  | **           |
| Bifidobacteriaceae | Temperature              | 6.254    | 1  | 0.012   | *            |
| Bifidobacteriaceae | Infection                | 0.0004   | 1  | 0.98    |              |
| Bifidobacteriaceae | Temperature <sup>2</sup> | 6.188    | 1  | 0.013   | *            |
| Bifidobacteriaceae | Colony                   | 25.952   | 4  | < 0.001 | ***          |

|                    |               |       |   |       |   |
|--------------------|---------------|-------|---|-------|---|
| Bifidobacteriaceae | Marginal.cell | 6.225 | 1 | 0.013 | * |
|--------------------|---------------|-------|---|-------|---|

38

39

40 **Supplementary Table 3. Significance of terms in models of *C. bombi* infection intensity.** A separate  
 41 model was fit with abundance of total bacteria (Family = "Total") and abundance of each family as a  
 42 covariate, as indicated in the column "Family". "Marginal.cell" refers to length of the forewing marginal  
 43 cell, an index of bee body size. This predictor was significant only for models with Neisseriaceae.  
 44 "Significance" column indicates predictors with  $P < 0.05$  (\*),  $P < 0.01$  (\*\*), and  $P < 0.001$  (\*\*\*).

| Family             | Predictor                | $\chi^2$ | df | Pvalue  | Significance |
|--------------------|--------------------------|----------|----|---------|--------------|
| Total              | Temperature              | 36       | 1  | < 0.001 | ***          |
| Total              | Temperature <sup>2</sup> | 4.89     | 1  | 0.027   | *            |
| Total              | Colony                   | 47.84    | 4  | < 0.001 | ***          |
| Total              | log(abundance)           | 5.31     | 1  | 0.021   | *            |
| Orbaceae           | Temperature              | 30.38    | 1  | < 0.001 | ***          |
| Orbaceae           | Temperature <sup>2</sup> | 4.4      | 1  | 0.036   | *            |
| Orbaceae           | Colony                   | 48.24    | 4  | < 0.001 | ***          |
| Orbaceae           | log(abundance)           | 7.17     | 1  | 0.0074  | **           |
| Neisseriaceae      | Temperature              | 39.73    | 1  | < 0.001 | ***          |
| Neisseriaceae      | Temperature <sup>2</sup> | 4.32     | 1  | 0.038   | *            |
| Neisseriaceae      | Colony                   | 48.26    | 4  | < 0.001 | ***          |
| Neisseriaceae      | Marginal.cell            | 4.07     | 1  | 0.044   | *            |
| Neisseriaceae      | log(abundance)           | 2.1      | 1  | 0.15    |              |
| Lactobacillaceae   | Temperature              | 39.03    | 1  | < 0.001 | ***          |
| Lactobacillaceae   | Temperature <sup>2</sup> | 3.88     | 1  | 0.049   | *            |
| Lactobacillaceae   | Colony                   | 46.59    | 4  | < 0.001 | ***          |
| Lactobacillaceae   | log(abundance)           | 0.76     | 1  | 0.38    |              |
| Bifidobacteriaceae | Temperature              | 36.86    | 1  | < 0.001 | ***          |
| Bifidobacteriaceae | Temperature <sup>2</sup> | 3.93     | 1  | 0.047   | *            |
| Bifidobacteriaceae | Colony                   | 45.96    | 4  | < 0.001 | ***          |
| Bifidobacteriaceae | log(abundance)           | 0.49     | 1  | 0.48    |              |
